# Supplementary material for: Large tandem duplications affect gene expression, 3D organization, and plant–pathogen response
Source: HighWire-hosted journal article supplement (doi:10.1101/gr.261586.120), 2020-10-08
Supplement: Supplemental_Table_S1.xlsx [file Supplemental_Table_S1.xlsx]

## Sheet: DUP-GENES
List of duplicated genes in L6F6
GENE
AT1G54770
AT1G54775
AT1G54780
AT1G54790
AT1G54820
AT1G54830
AT1G54840
AT1G54850
AT1G54860
AT1G54870
AT1G54880
AT1G54890
AT1G54905
AT1G54920
AT1G54923
AT1G54926
AT1G54930
AT1G54940
AT1G54950
AT1G54955
AT1G54960
AT1G54970
AT1G54980
AT1G54985
AT1G54990
AT1G55000
AT1G55010
AT1G55020
AT1G55030
AT1G55035
AT1G55040
AT1G55045
AT1G55050
AT1G55060
AT1G55070
AT1G55080
AT1G55090
AT1G55100
AT1G55110
AT1G55120
AT1G55130
AT1G55140
AT1G55150
AT1G55152
AT1G55160
AT1G55170
AT1G55175
AT1G55180
AT1G55190
AT1G55200
AT1G55205
AT1G55207
AT1G55210
AT1G55220
AT1G55221
AT1G55230
AT1G55240
AT1G55250
AT1G55260
AT1G55265
AT1G55270
AT1G55280
AT1G55290
AT1G55300
AT1G55310
AT1G55320
AT1G55325
AT2G14793
AT2G14796
AT2G14800
AT2G14810
AT2G14820
AT2G14830
AT2G14835
AT2G14840
AT2G14843
AT2G14846
AT2G14850
AT2G14860
AT2G14870
AT2G14878
AT2G14880
AT2G14890
AT2G14900
AT2G14910
AT2G14920
AT2G14930
AT2G37520
AT2G37530
AT2G37540
AT2G37550
AT2G37555
AT2G37560
AT2G37570
AT2G37580
AT2G37585
AT2G37590
AT2G37600
AT2G37610
AT2G37620
AT2G37630
AT2G37640
AT2G37650
AT2G37660
AT2G37670
AT2G37678
AT2G37680
AT2G37690
AT2G37700
AT2G37710
AT2G37720
AT2G37730
AT2G37740
AT2G37750
AT2G37760
AT2G37770
AT2G37780
AT2G37790
AT2G37800
AT2G37810
AT2G37820
AT2G37830
AT2G37840
AT2G37860
AT2G37870
AT2G37880
AT2G37890
AT2G37900
AT2G37910
AT2G37920
AT2G37925
AT2G37930
AT2G37940
AT2G37950
AT2G37960
AT2G37970
AT2G37975
AT2G37980
AT2G37990
AT2G38000
AT2G38010
AT2G38020
AT2G38025
AT2G38030
AT2G38040
AT2G38050
AT2G38060
AT2G38070
AT2G38080
AT2G38090
AT2G38100
AT2G38110
AT2G38120
AT2G38130
AT2G38140
AT2G38150
AT2G38152
AT2G38160
AT2G38170
AT2G38180
AT2G38185
AT2G38195
AT2G38210
AT2G38220
AT2G38230
AT2G38240
AT2G38250
AT2G38255
AT2G38260
AT2G38270
AT2G38280
AT2G38290
AT2G38300
AT2G38304
AT2G38310
AT2G38320
AT2G38325
AT2G38330
AT2G38340
AT2G38350
AT2G38360
AT2G38365
AT2G38370
AT2G38380
AT2G38390
AT2G38400
AT2G38410
AT2G38420
AT2G38430
AT2G38440
AT2G38450
AT2G38460
AT4G02960
AT4G02970
AT4G02980
AT4G02990
AT4G03000
AT4G03010
AT4G03020
AT4G03030
AT4G03038
AT4G03039
AT4G03040
AT4G03050
AT4G03060
AT4G03063
AT4G03070
AT4G03080
AT4G03090
AT4G03100
AT4G03110
AT4G03113
AT4G03115
AT4G03120
AT4G03130
AT4G03135
AT4G03140
AT4G03150
AT4G03153
AT4G03156
AT4G03160
AT4G03165
AT4G03170
AT4G03175
AT4G03180
AT4G03190
AT4G03200
AT4G03205
AT4G03210
AT4G03220
AT4G03230
AT4G03240
AT4G03250
AT4G03260
AT4G03270
AT4G03280
AT4G03285
AT4G03290
AT4G03292
AT4G03295
AT4G03298
AT4G03300
AT4G03305
AT4G03310
AT4G03320
AT4G03330
AT4G03340
AT4G03350
AT4G03360
AT4G03364
AT4G03370
AT4G03376
AT4G03380
AT4G03390
AT4G03400
AT4G03405
AT4G03410
AT4G03415
AT4G03420
AT4G03430
AT4G03435
AT4G03437
AT4G03438
AT4G03440
AT4G03443
AT4G03445
AT4G03450
AT4G03455
AT4G03460
AT4G03470
AT4G03480
AT4G03490
AT4G03500
AT4G03505
AT4G03510
AT4G03520
AT4G03530
AT4G03540
AT4G03550
AT4G03560
AT4G03565
AT4G03566
AT4G03570
AT4G03580
AT4G03590
AT4G03600
AT4G03610
AT4G03620
AT4G03630
AT4G03635
AT4G03640
AT4G03650
AT4G03660
AT4G03670
AT4G03680
AT4G03690
AT4G03695
AT4G03700
AT4G03710
AT4G03720
AT4G03723
AT4G03726
AT4G03728
AT4G03730
AT4G03732
AT4G03740
AT4G03745
AT4G03750
AT4G03760
AT4G03770
AT4G03775
AT4G03780
AT4G03790
AT4G03795
AT4G03800
AT4G03810
AT4G03811
AT4G03813
AT4G03816
AT4G03820
AT4G03823
AT4G03824
AT4G03825
AT4G03826
AT4G03827
AT4G03830
AT4G03835
AT4G03837
AT4G03840
AT4G03850
AT4G03860
AT4G03865
AT4G03870
AT4G03873
AT4G03876
AT4G03880
AT4G03885
AT4G03890
AT4G03900
AT4G03910
AT4G03911
AT4G03912
AT4G03913
AT4G03914
AT4G03916
AT4G03920
AT4G03923
AT4G03926
AT4G03930
AT4G03935
AT4G03940
AT4G03945
AT4G03950
AT4G03960
AT4G03965
AT4G03970
AT4G03975
AT4G03976
AT4G03977
AT4G03978
AT4G03979
AT4G03980
AT4G03981
AT4G03990
AT4G04000
AT4G04010
AT4G04020
AT4G04030
AT4G04040
AT4G04050
AT4G04070
AT4G04077
AT4G04078
AT4G04080
AT4G04090
AT4G04100
AT4G04105
AT4G04110
AT4G04120
AT4G04130
AT4G04140
AT4G04145
AT4G04150
AT4G04155
AT4G04157
AT4G04165
AT4G04167
AT4G04170
AT4G04175
AT4G04180
AT4G04190
AT4G04200
AT4G04210
AT4G04220
AT4G04221
AT4G04223
AT4G04230
AT4G04245
AT4G04250
AT4G04255
AT4G04260
AT4G04270
AT4G04273
AT4G04276
AT4G04280
AT4G04290
AT4G04293
AT4G04296
AT4G04300
AT4G04310
AT4G04313
AT4G04315
AT4G04316
AT4G04320
AT4G04330
AT4G04340
AT4G04350
AT4G04360
AT4G04370
AT4G04375
AT4G04380
AT4G04390
AT4G04392
AT4G04393
AT4G04394
AT4G04395
AT4G04396
AT4G04398
AT4G04400
AT4G04402
AT4G04404
AT4G04405
AT4G04407
AT4G04408
AT4G04409
AT4G04410
AT4G04420
AT4G04423
AT4G04426
AT4G04430
AT4G04440
AT4G04450
AT4G04460
AT4G04470
AT4G04480
AT4G04490
AT4G04495
AT4G04500
AT4G04510
AT4G04520
AT4G04525
AT4G04530
AT4G04540
AT4G04545
AT4G04547
AT4G04550
AT4G04560
AT4G04570
AT4G04580
AT4G04590
AT4G04600
AT4G04601
AT4G04610
AT4G04614
AT4G04620
AT4G04630
AT4G04632
AT4G04635
AT4G04640
AT4G04650
AT4G04653
AT4G04655
AT4G04660
AT4G04670
AT4G04680
AT4G04690
AT4G04692
AT4G04693
AT4G04695
AT4G04700
AT4G04710
AT4G04720
AT4G04730
AT4G04740
AT4G04745
AT4G04750
AT4G04760
AT4G04770
AT4G04775
AT4G04780
AT4G04790
AT4G04800
AT4G04810
AT4G04820
AT4G04830
AT4G04840
AT4G04850
AT4G04860
AT4G04870
AT4G04880
AT4G04885
AT4G04890
AT4G04900
AT4G04910
AT4G04920
AT4G04925
AT4G04930
AT4G04940
AT4G04950
AT4G04953
AT4G04955
AT4G04957
AT4G04960
AT4G04970
AT4G04972
AT4G04980
AT4G04985
AT4G04990
AT4G05000
AT4G05010
AT4G05018
AT4G05020
AT4G05030
AT4G05040
AT4G05048
AT4G05049
AT4G05050
AT4G05053
AT4G05060
AT4G05070
AT4G05071
AT4G05073
AT4G05076
AT4G05080
AT4G05087
AT4G05090
AT4G05091
AT4G05095
AT4G05100
AT4G05105
AT4G05110
AT4G05120
AT4G05130
AT4G05133
AT4G05136
AT4G05140
AT4G05145
AT4G05150
AT4G05160
AT4G05170
AT4G05180
AT4G05190
AT4G05200
AT4G05210
AT4G05220
AT4G05230
AT4G05240
AT4G05250
AT4G05260
AT4G05265
AT4G05270
AT4G05280
AT4G05290
AT4G05300
AT4G05303
AT4G05306
AT4G05310
AT4G05320
AT4G05330
AT4G05340
AT4G05350
AT4G05360
AT4G05370
AT4G05380
AT4G05390
AT4G05400
AT4G05410
AT4G05420
AT4G05430
AT4G05440
AT4G05450
AT4G05460
AT4G05470
AT4G05475
AT4G19860
AT4G19865
AT4G19870
AT4G19880
AT4G19890
AT4G19900
AT4G19902
AT4G19905
AT4G19910
AT4G19920
AT4G19925
AT4G19930
AT4G19940
AT4G19950
AT4G19960
AT4G19970
AT4G19980
AT4G19985
AT4G19990
AT4G20000
AT5G33240
AT5G33250
AT5G33251
AT5G33252
AT5G33253
AT5G33254
AT5G33255
AT5G33256
AT5G33257
AT5G33258
AT5G33259
AT5G33260
AT5G33270
AT5G33280
AT5G33285
AT5G33290
AT5G33300
AT5G33303
AT5G33306
AT5G33310
AT5G33315
AT5G33320

## Sheet: DUP-TE
List of duplicated TE in L6F6
TE
AT1TE67495
AT1TE67500
AT1TE67505
AT1TE67530
AT1TE67570
AT1TE67575
AT1TE67585
AT1TE67590
AT1TE67595
AT1TE67600
AT1TE67605
AT1TE67610
AT1TE67615
AT1TE67620
AT1TE67625
AT1TE67635
AT1TE67640
AT1TE67645
AT1TE67650
AT1TE67660
AT1TE67665
AT1TE67670
AT1TE67675
AT1TE67680
AT1TE67685
AT1TE67690
AT1TE67695
AT1TE67700
AT1TE67705
AT1TE67710
AT1TE67715
AT1TE67720
AT1TE67750
AT1TE67755
AT1TE67760
AT1TE67765
AT1TE67775
AT1TE67780
AT1TE67785
AT1TE67790
AT1TE67800
AT1TE67805
AT1TE67810
AT1TE67820
AT1TE67830
AT1TE67860
AT1TE67865
AT1TE67880
AT1TE67885
AT1TE67890
AT1TE67900
AT1TE67905
AT1TE67915
AT1TE67920
AT1TE68040
AT1TE68045
AT1TE68070
AT1TE68100
AT1TE68105
AT1TE68115
AT1TE68120
AT2TE25850
AT2TE25855
AT2TE25865
AT2TE25870
AT2TE25890
AT2TE25930
AT2TE25935
AT2TE25940
AT2TE25960
AT2TE25965
AT2TE25970
AT2TE25975
AT2TE25980
AT2TE25985
AT2TE25990
AT2TE25995
AT2TE26000
AT2TE26005
AT2TE26010
AT2TE26015
AT2TE26020
AT2TE26025
AT2TE26030
AT2TE26035
AT2TE26040
AT2TE26070
AT2TE26090
AT2TE26095
AT2TE26100
AT2TE26105
AT2TE26110
AT2TE26115
AT2TE26120
AT2TE26130
AT2TE26140
AT2TE26145
AT2TE26150
AT2TE26155
AT2TE26160
AT2TE26165
AT2TE26170
AT2TE26175
AT2TE26180
AT2TE26185
AT2TE26190
AT2TE26195
AT2TE26200
AT2TE26205
AT2TE26210
AT2TE26215
AT2TE26225
AT2TE26230
AT2TE70700
AT2TE70740
AT2TE70745
AT2TE70830
AT2TE70870
AT2TE70875
AT2TE71040
AT2TE71050
AT2TE71055
AT2TE71060
AT2TE71160
AT2TE71330
AT2TE71335
AT2TE71340
AT2TE71350
AT2TE71400
AT2TE71530
AT2TE71535
AT2TE71580
AT2TE71660
AT2TE71670
AT2TE71720
AT2TE71725
AT2TE71730
AT2TE71735
AT2TE71740
AT2TE71745
AT2TE71770
AT2TE71850
AT2TE71890
AT2TE71980
AT2TE72130
AT4TE06710
AT4TE06830
AT4TE06835
AT4TE06840
AT4TE06845
AT4TE06860
AT4TE06865
AT4TE06870
AT4TE06875
AT4TE06880
AT4TE06910
AT4TE06950
AT4TE06955
AT4TE06990
AT4TE07030
AT4TE07035
AT4TE07110
AT4TE07115
AT4TE07125
AT4TE07130
AT4TE07310
AT4TE07315
AT4TE07320
AT4TE07360
AT4TE07365
AT4TE07390
AT4TE07395
AT4TE07400
AT4TE07405
AT4TE07410
AT4TE07415
AT4TE07420
AT4TE07425
AT4TE07430
AT4TE07435
AT4TE07440
AT4TE07530
AT4TE07535
AT4TE07540
AT4TE07560
AT4TE07565
AT4TE07570
AT4TE07710
AT4TE07715
AT4TE07740
AT4TE07800
AT4TE07840
AT4TE07970
AT4TE07975
AT4TE07980
AT4TE07985
AT4TE07990
AT4TE07995
AT4TE08005
AT4TE08070
AT4TE08110
AT4TE08115
AT4TE08120
AT4TE08125
AT4TE08130
AT4TE08135
AT4TE08140
AT4TE08145
AT4TE08200
AT4TE08205
AT4TE08210
AT4TE08215
AT4TE08220
AT4TE08225
AT4TE08230
AT4TE08235
AT4TE08240
AT4TE08245
AT4TE08250
AT4TE08260
AT4TE08265
AT4TE08310
AT4TE08315
AT4TE08320
AT4TE08340
AT4TE08345
AT4TE08350
AT4TE08355
AT4TE08360
AT4TE08365
AT4TE08370
AT4TE08380
AT4TE08385
AT4TE08390
AT4TE08395
AT4TE08400
AT4TE08405
AT4TE08410
AT4TE08415
AT4TE08420
AT4TE08430
AT4TE08435
AT4TE08440
AT4TE08445
AT4TE08450
AT4TE08455
AT4TE08460
AT4TE08465
AT4TE08470
AT4TE08475
AT4TE08720
AT4TE08725
AT4TE08730
AT4TE08735
AT4TE08740
AT4TE08745
AT4TE08750
AT4TE08755
AT4TE08760
AT4TE08765
AT4TE08770
AT4TE08775
AT4TE08780
AT4TE08785
AT4TE08790
AT4TE08795
AT4TE08800
AT4TE08810
AT4TE08815
AT4TE08820
AT4TE08825
AT4TE08830
AT4TE08835
AT4TE08845
AT4TE08850
AT4TE08855
AT4TE08860
AT4TE08865
AT4TE08870
AT4TE08875
AT4TE08910
AT4TE08915
AT4TE08920
AT4TE08925
AT4TE08930
AT4TE08940
AT4TE08945
AT4TE08950
AT4TE08960
AT4TE08965
AT4TE08970
AT4TE08975
AT4TE08980
AT4TE08985
AT4TE08990
AT4TE08995
AT4TE09000
AT4TE09005
AT4TE09010
AT4TE09015
AT4TE09020
AT4TE09025
AT4TE09035
AT4TE09040
AT4TE09045
AT4TE09050
AT4TE09055
AT4TE09060
AT4TE09065
AT4TE09070
AT4TE09075
AT4TE09080
AT4TE09085
AT4TE09090
AT4TE09095
AT4TE09105
AT4TE09110
AT4TE09115
AT4TE09120
AT4TE09130
AT4TE09135
AT4TE09140
AT4TE09145
AT4TE09150
AT4TE09155
AT4TE09160
AT4TE09165
AT4TE09170
AT4TE09180
AT4TE09185
AT4TE09190
AT4TE09195
AT4TE09210
AT4TE09215
AT4TE09220
AT4TE09225
AT4TE09230
AT4TE09235
AT4TE09240
AT4TE09245
AT4TE09250
AT4TE09255
AT4TE09260
AT4TE09265
AT4TE09270
AT4TE09275
AT4TE09280
AT4TE09290
AT4TE09295
AT4TE09300
AT4TE09305
AT4TE09310
AT4TE09315
AT4TE09320
AT4TE09325
AT4TE09330
AT4TE09335
AT4TE09360
AT4TE09365
AT4TE09375
AT4TE09380
AT4TE09385
AT4TE09390
AT4TE09395
AT4TE09400
AT4TE09405
AT4TE09410
AT4TE09415
AT4TE09420
AT4TE09425
AT4TE09435
AT4TE09440
AT4TE09445
AT4TE09450
AT4TE09455
AT4TE09460
AT4TE09465
AT4TE09470
AT4TE09480
AT4TE09485
AT4TE09490
AT4TE09495
AT4TE09500
AT4TE09505
AT4TE09510
AT4TE09515
AT4TE09520
AT4TE09530
AT4TE09535
AT4TE09540
AT4TE09545
AT4TE09550
AT4TE09555
AT4TE09560
AT4TE09565
AT4TE09570
AT4TE09580
AT4TE09590
AT4TE09610
AT4TE09615
AT4TE09620
AT4TE09650
AT4TE09655
AT4TE09660
AT4TE09670
AT4TE09700
AT4TE09705
AT4TE09710
AT4TE09715
AT4TE09720
AT4TE09725
AT4TE09730
AT4TE09735
AT4TE09740
AT4TE09745
AT4TE09750
AT4TE09755
AT4TE09760
AT4TE09765
AT4TE09780
AT4TE09790
AT4TE09795
AT4TE09800
AT4TE09805
AT4TE09810
AT4TE09815
AT4TE09820
AT4TE09825
AT4TE09830
AT4TE09835
AT4TE09845
AT4TE09850
AT4TE09855
AT4TE09860
AT4TE09865
AT4TE09870
AT4TE09880
AT4TE09885
AT4TE09890
AT4TE09895
AT4TE09900
AT4TE09905
AT4TE09910
AT4TE09915
AT4TE09920
AT4TE09925
AT4TE09930
AT4TE09935
AT4TE09940
AT4TE09945
AT4TE09950
AT4TE09955
AT4TE09960
AT4TE09965
AT4TE09970
AT4TE09980
AT4TE09985
AT4TE09990
AT4TE09995
AT4TE10000
AT4TE10005
AT4TE10010
AT4TE10030
AT4TE10035
AT4TE10040
AT4TE10045
AT4TE10050
AT4TE10055
AT4TE10060
AT4TE10065
AT4TE10070
AT4TE10075
AT4TE10080
AT4TE10160
AT4TE10165
AT4TE10170
AT4TE10175
AT4TE10180
AT4TE10185
AT4TE10190
AT4TE10195
AT4TE10200
AT4TE10205
AT4TE10210
AT4TE10215
AT4TE10225
AT4TE10230
AT4TE10235
AT4TE10240
AT4TE10245
AT4TE10250
AT4TE10265
AT4TE10270
AT4TE10275
AT4TE10280
AT4TE10285
AT4TE10290
AT4TE10320
AT4TE10325
AT4TE10335
AT4TE10345
AT4TE10350
AT4TE10360
AT4TE10365
AT4TE10370
AT4TE10375
AT4TE10385
AT4TE10395
AT4TE10400
AT4TE10440
AT4TE10450
AT4TE10455
AT4TE10465
AT4TE10475
AT4TE10480
AT4TE10485
AT4TE10490
AT4TE10495
AT4TE10500
AT4TE10505
AT4TE10515
AT4TE10520
AT4TE10525
AT4TE10535
AT4TE10540
AT4TE10545
AT4TE10550
AT4TE10555
AT4TE10560
AT4TE10565
AT4TE10570
AT4TE10575
AT4TE10580
AT4TE10585
AT4TE10590
AT4TE10595
AT4TE10600
AT4TE10605
AT4TE10615
AT4TE10620
AT4TE10625
AT4TE10630
AT4TE10635
AT4TE10640
AT4TE10645
AT4TE10650
AT4TE10655
AT4TE10660
AT4TE10665
AT4TE10670
AT4TE10675
AT4TE10680
AT4TE10700
AT4TE10705
AT4TE10715
AT4TE10720
AT4TE10725
AT4TE10730
AT4TE10735
AT4TE10740
AT4TE10750
AT4TE10755
AT4TE10760
AT4TE10765
AT4TE10770
AT4TE10775
AT4TE10780
AT4TE10785
AT4TE10810
AT4TE10840
AT4TE10845
AT4TE10850
AT4TE10855
AT4TE10860
AT4TE10865
AT4TE10870
AT4TE10880
AT4TE10885
AT4TE10890
AT4TE10895
AT4TE10900
AT4TE10905
AT4TE10910
AT4TE10915
AT4TE10920
AT4TE10925
AT4TE10930
AT4TE10935
AT4TE10945
AT4TE10950
AT4TE10955
AT4TE10960
AT4TE10965
AT4TE10975
AT4TE10980
AT4TE10985
AT4TE10990
AT4TE10995
AT4TE11000
AT4TE11060
AT4TE11065
AT4TE11070
AT4TE11075
AT4TE11080
AT4TE11090
AT4TE11130
AT4TE11140
AT4TE11150
AT4TE11155
AT4TE11170
AT4TE11175
AT4TE11180
AT4TE11185
AT4TE11190
AT4TE11195
AT4TE11200
AT4TE11205
AT4TE11230
AT4TE11235
AT4TE11245
AT4TE11250
AT4TE11255
AT4TE11280
AT4TE11285
AT4TE11290
AT4TE11295
AT4TE11300
AT4TE11310
AT4TE11315
AT4TE11320
AT4TE11330
AT4TE11335
AT4TE11340
AT4TE11345
AT4TE11390
AT4TE11395
AT4TE11400
AT4TE11405
AT4TE11410
AT4TE11450
AT4TE11455
AT4TE11460
AT4TE11465
AT4TE11470
AT4TE11500
AT4TE11510
AT4TE11520
AT4TE11525
AT4TE11530
AT4TE11580
AT4TE11585
AT4TE11595
AT4TE11600
AT4TE11610
AT4TE11615
AT4TE11650
AT4TE11655
AT4TE11700
AT4TE11705
AT4TE11715
AT4TE11770
AT4TE11775
AT4TE11780
AT4TE11785
AT4TE11790
AT4TE11800
AT4TE11805
AT4TE11810
AT4TE11815
AT4TE11820
AT4TE11825
AT4TE11830
AT4TE11835
AT4TE11840
AT4TE11845
AT4TE11855
AT4TE11860
AT4TE11865
AT4TE11900
AT4TE11920
AT4TE11925
AT4TE11930
AT4TE11935
AT4TE11940
AT4TE11945
AT4TE11950
AT4TE11955
AT4TE11960
AT4TE11965
AT4TE11970
AT4TE11975
AT4TE11980
AT4TE11985
AT4TE11990
AT4TE11995
AT4TE12000
AT4TE12010
AT4TE12015
AT4TE12030
AT4TE12035
AT4TE12070
AT4TE12075
AT4TE12090
AT4TE12095
AT4TE12105
AT4TE12110
AT4TE12115
AT4TE12140
AT4TE12145
AT4TE12150
AT4TE12155
AT4TE12160
AT4TE12165
AT4TE12170
AT4TE12175
AT4TE12185
AT4TE12190
AT4TE12195
AT4TE12200
AT4TE12205
AT4TE12215
AT4TE12220
AT4TE12225
AT4TE12230
AT4TE12235
AT4TE12240
AT4TE12245
AT4TE12250
AT4TE12260
AT4TE12270
AT4TE12275
AT4TE12280
AT4TE12290
AT4TE12300
AT4TE12305
AT4TE12330
AT4TE12335
AT4TE12345
AT4TE12355
AT4TE12360
AT4TE12365
AT4TE12375
AT4TE12380
AT4TE12385
AT4TE12390
AT4TE12420
AT4TE12425
AT4TE12430
AT4TE12440
AT4TE12445
AT4TE12455
AT4TE12530
AT4TE12560
AT4TE12565
AT4TE12570
AT4TE12575
AT4TE12580
AT4TE12610
AT4TE12615
AT4TE12620
AT4TE12660
AT4TE12690
AT4TE12695
AT4TE12700
AT4TE12740
AT4TE12750
AT4TE12755
AT4TE12760
AT4TE12860
AT4TE12865
AT4TE12870
AT4TE12875
AT4TE12900
AT4TE49460
AT4TE49465
AT4TE49470
AT4TE49490
AT4TE49500
AT4TE49505
AT4TE49510
AT4TE49515
AT4TE49520
AT4TE49525
AT4TE49530
AT4TE49535
AT4TE49545
AT4TE49600
AT4TE49605
AT4TE49620
AT4TE49625
AT5TE44255
AT5TE44260
AT5TE44265
AT5TE44270
AT5TE44275
AT5TE44280
AT5TE44285
AT5TE44290
AT5TE44295
AT5TE44300
AT5TE44305
AT5TE44310
AT5TE44315
AT5TE44320
AT5TE44325
AT5TE44330
AT5TE44335
AT5TE44340
AT5TE44345
AT5TE44350
AT5TE44355
AT5TE44360
AT5TE44365
AT5TE44370
AT5TE44375
AT5TE44385
AT5TE44390
AT5TE44395
AT5TE44400
AT5TE44405
AT5TE44410
AT5TE44415
AT5TE44420
AT5TE44425
AT5TE44430
AT5TE44435
AT5TE44440
AT5TE44445
AT5TE44450
AT5TE44460
AT5TE44465
AT5TE44470
AT5TE44475
AT5TE44480
AT5TE44485
AT5TE44490
AT5TE44520
AT5TE44525
AT5TE44530
AT5TE44535
AT5TE44540
AT5TE44545
AT5TE44550
AT5TE44555
AT5TE44565
AT5TE44570
AT5TE44575
AT5TE44580
AT5TE44585
AT5TE44590
AT5TE44595

## Sheet: GENES-UP
List of up-regulated genes in L6F6 with a log2FoldChange 1,5<
GENE	log2FoldChange	padj
AT1G21520	1.50317	7.16526e-07
AT1G10340	1.50385	9.39398e-10
AT4G03100	1.50611	0.00906378
AT3G50480	1.5067	5.85398e-14
AT4G39830	1.50837	1.57547e-06
AT3G26500	1.5091	4.53492e-06
AT1G21100	1.5092	4.83416e-06
AT3G04220	1.50986	0.00210314
AT1G33475	1.51236	0.0100502
AT2G38370	1.51771	0.00147026
AT1G76600	1.51856	0.00821597
AT1G05575	1.51911	0.000750046
AT1G19020	1.52557	0.000112459
AT2G23320	1.52594	2.98294e-08
AT2G37890	1.52741	1.89911e-07
AT2G37760	1.52885	3.16345e-05
AT4G04830	1.52908	1.75299e-10
AT4G30640	1.53509	0.00159697
AT2G37930	1.53983	3.76182e-08
AT2G37650	1.5402	8.3741e-18
AT2G15390	1.54057	1.60655e-11
AT5G26690	1.54463	9.62308e-08
AT3G02550	1.54475	0.000797919
AT4G04190	1.54529	9.78119e-05
AT1G25560	1.54779	3.82024e-06
AT4G03210	1.55028	2.62571e-06
AT2G37580	1.55774	9.58525e-05
AT5G10380	1.55926	2.68233e-19
AT1G29715	1.56522	0.000673519
AT4G23320	1.56586	1.11558e-05
AT1G31290	1.56832	0.000564577
AT5G40690	1.56838	4.26185e-07
AT4G25070	1.56842	5.74885e-08
AT5G61600	1.569	0.000382336
AT3G52400	1.57078	2.19919e-07
AT2G38450	1.57249	5.41722e-10
AT3G28890	1.57332	8.66474e-09
AT3G28210	1.57624	0.000623636
AT3G18773	1.57671	1.15152e-05
AT4G00700	1.57935	0.000278071
AT2G38330	1.57981	5.45875e-17
AT4G04570	1.58551	9.52503e-14
AT2G20142	1.58795	8.96433e-14
AT2G38050	1.59879	7.50688e-16
AT1G57990	1.60124	0.000300603
AT1G66090	1.6025	0.000111442
AT5G24530	1.60546	2.12268e-33
AT1G73805	1.60669	3.28905e-22
AT1G72070	1.61031	0.00293276
AT3G49780	1.61124	4.59109e-05
AT4G37520	1.61368	7.08325e-08
AT1G58300	1.62111	3.54677e-05
AT3G60580	1.62243	5.51649e-05
AT5G19120	1.62992	2.1408e-07
AT4G02380	1.63262	2.31858e-05
AT5G10695	1.63353	9.30712e-06
AT1G78410	1.6344	3.51263e-06
AT1G13340	1.63568	1.4748e-05
AT1G80840	1.63842	7.96687e-07
AT5G47130	1.64189	0.00791142
AT2G24550	1.64319	1.55759e-07
AT2G25440	1.64388	0.00815124
AT4G04450	1.65079	6.83621e-05
AT3G24900	1.65119	4.30241e-05
AT2G38230	1.65601	8.85668e-08
AT2G38090	1.65819	6.32668e-07
AT1G53625	1.65845	0.00218357
AT5G08240	1.663	2.49607e-05
AT2G37640	1.66301	1.71455e-09
AT1G35210	1.66409	1.56586e-05
AT3G50470	1.66774	8.91395e-13
AT4G28703	1.67063	6.35282e-07
AT1G14260	1.67271	0.007206
AT1G26420	1.67437	3.57237e-08
AT2G38270	1.67544	8.51424e-19
AT2G42840	1.6828	0.000740305
AT1G11600	1.68677	0.00651996
AT1G12160	1.68741	0.000570719
AT1G65500	1.69885	6.21971e-06
AT1G59930	1.70695	0.00332489
AT2G38430	1.71006	8.52308e-06
AT4G05020	1.71061	4.29256e-07
AT2G38185	1.71291	5.82612e-16
AT4G12490	1.72282	0.000258836
AT2G29350	1.72352	7.74477e-05
AT4G17490	1.72528	0.000314949
AT1G20350	1.72781	2.0436e-06
AT1G30730	1.72896	0.00563394
AT3G49570	1.72902	0.000294377
AT5G52740	1.73009	0.000361913
AT4G08555	1.73166	0.0030154
AT1G35230	1.73571	1.4327e-09
AT1G32920	1.73572	0.00092253
AT1G01680	1.74011	2.50299e-09
AT3G17690	1.74069	0.00116018
AT3G05600	1.74532	0.0020033
AT1G59590	1.74673	1.44386e-09
AT2G38140	1.74983	5.3636e-06
AT2G14620	1.75088	0.00983192
AT3G04640	1.75429	0.000156851
AT1G68840	1.75512	1.64323e-06
AT3G55980	1.75623	4.71155e-06
AT4G28390	1.75701	7.20497e-06
AT1G66160	1.75833	0.00381794
AT2G37680	1.7616	1.68601e-13
AT3G53150	1.76253	0.00780942
AT5G09290	1.76796	5.02989e-07
AT4G05060	1.76895	1.72633e-30
AT2G37630	1.77203	1.55413e-28
AT2G37540	1.77227	1.22179e-12
AT5G22540	1.77323	1.8973e-06
AT4G05000	1.77654	1.10631e-18
AT2G38070	1.77812	0.000106789
AT1G30720	1.78202	0.00189282
AT1G76930	1.78969	3.75409e-08
AT4G05010	1.79263	6.51891e-08
AT5G54490	1.79384	1.25764e-05
AT1G57630	1.79407	1.79563e-07
AT1G19610	1.79824	0.00279668
AT1G29290	1.79955	0.00663093
AT4G27460	1.79981	0.000120713
AT2G22880	1.80121	0.000460356
AT1G27730	1.80376	9.54475e-06
AT1G51460	1.80389	0.00579811
AT1G55210	1.8044	3.63935e-16
AT4G03510	1.8058	6.0445e-19
AT1G14880	1.8079	4.88255e-08
AT2G37690	1.80816	4.84297e-20
AT3G22600	1.80984	0.000305919
AT3G49580	1.81351	0.0011389
AT5G38250	1.816	4.59109e-05
AT1G21240	1.81601	9.6679e-05
AT4G04960	1.81637	1.11841e-24
AT5G13080	1.82074	0.00879831
AT2G37530	1.82215	1.44008e-05
AT5G46050	1.82232	1.65556e-06
AT3G15760	1.82425	1.46585e-08
AT3G61190	1.82714	0.00300189
AT2G38410	1.8315	4.95599e-24
AT3G21780	1.83586	5.83041e-05
AT2G37920	1.83684	3.43846e-21
AT1G14870	1.83684	2.00917e-06
AT2G32030	1.84215	4.10048e-05
AT3G46690	1.84322	0.00673474
AT2G01610	1.84652	0.000144874
AT1G56060	1.85169	1.15152e-05
AT2G38025	1.85336	6.38279e-14
AT2G33850	1.85611	0.000521793
AT3G56220	1.86529	0.00362457
AT1G28290	1.86848	0.00092253
AT4G37010	1.86848	0.00113555
AT1G33030	1.86874	0.00011762
AT2G25735	1.86929	1.50106e-05
AT3G09960	1.86966	0.00257512
AT5G24110	1.87097	7.93337e-05
AT2G31865	1.87204	1.77635e-20
AT5G23940	1.87659	7.1797e-06
AT5G39670	1.87809	5.66848e-15
AT3G09270	1.88737	0.00963347
AT3G48650	1.89836	6.07074e-13
AT1G72920	1.90201	9.21596e-06
AT5G49700	1.90325	0.000847543
AT2G37975	1.90355	4.879e-15
AT2G38120	1.90736	1.29339e-19
AT3G23240	1.91038	0.00141251
AT5G38900	1.91411	6.29336e-05
AT5G21940	1.92227	9.74325e-08
AT4G18250	1.92923	8.08206e-20
AT4G10500	1.93346	1.14384e-13
AT2G04495	1.93416	1.48501e-08
AT2G28790	1.93712	0.00149364
AT5G22530	1.94362	3.48334e-05
AT5G52760	1.94579	2.14214e-15
AT3G26470	1.94868	5.12855e-10
AT5G11920	1.95516	8.3563e-07
AT2G37900	1.9951	0.0020033
AT2G37940	1.99702	5.70422e-24
AT2G43590	1.9977	4.09198e-16
AT4G13820	1.99817	4.6788e-09
AT5G22380	1.9987	1.71601e-06
AT5G60800	2.00517	3.11971e-13
AT2G27660	2.00518	1.88478e-07
AT4G04408	2.00854	0.0014287
AT2G38130	2.01035	1.30499e-19
AT2G14900	2.02151	2.02917e-08
AT5G40230	2.02236	0.000109235
AT5G05300	2.02494	0.00024397
AT2G35930	2.03904	2.85941e-07
AT5G42380	2.03966	0.000147839
AT5G24200	2.04324	2.31761e-17
AT5G59820	2.04547	0.00109752
AT2G37710	2.05518	5.63051e-23
AT3G45130	2.05665	0.000118889
AT2G37590	2.06717	8.52984e-06
AT4G21840	2.07461	0.000236971
AT3G57240	2.07729	9.23397e-16
AT2G20670	2.08453	3.57237e-08
AT2G24165	2.08606	0.0034712
AT2G37980	2.09021	2.67187e-07
AT3G15518	2.09203	2.8039e-06
AT4G03450	2.09813	2.22952e-16
AT3G09260	2.09819	0.000318067
AT4G39670	2.107	7.07216e-07
AT3G13175	2.10812	0.000411103
AT4G23150	2.13431	1.75299e-10
AT2G37678	2.13566	5.60818e-22
AT5G47850	2.13653	1.53379e-05
AT1G58225	2.1373	1.03517e-14
AT2G37960	2.13818	0.000232747
AT3G57260	2.13983	2.45434e-11
AT3G18250	2.15221	0.00118732
AT2G37600	2.15659	2.33101e-12
AT1G36060	2.15763	1.43419e-06
AT3G21080	2.15936	1.05224e-07
AT4G11070	2.16306	0.000155581
AT3G13950	2.16702	1.25345e-05
AT2G38210	2.17042	4.451e-06
AT3G04717	2.18111	0.00546724
AT5G42830	2.18175	2.7713e-15
AT5G67450	2.18375	3.06887e-07
AT3G13610	2.18593	0.00132115
AT4G09770	2.18921	0.000446858
AT3G48630	2.19573	6.86964e-06
AT2G40740	2.1959	0.00134395
AT5G52390	2.20951	1.10627e-06
AT4G23810	2.21267	7.02494e-12
AT2G38310	2.22645	2.10401e-28
AT5G64810	2.23242	7.91498e-10
AT1G65970	2.23627	0.00286963
AT2G37950	2.24526	5.06441e-09
AT5G27420	2.24913	2.60455e-10
AT5G52860	2.25854	0.000860548
AT2G40000	2.26277	1.0007e-10
AT4G13395	2.26893	0.00101618
AT4G04490	2.27893	1.12781e-10
AT3G44350	2.29626	2.28612e-06
AT2G44380	2.33801	0.000480597
AT5G56544	2.35778	4.75803e-06
AT4G37610	2.36246	5.5606e-05
AT2G29110	2.3655	6.24287e-11
AT1G19250	2.3657	0.00308943
AT1G51920	2.36639	0.00294859
AT3G28500	2.37805	0.00148969
AT2G33080	2.38703	4.58259e-05
AT4G24110	2.3925	0.00313384
AT1G02065	2.39989	0.007206
AT3G01830	2.4041	6.01001e-06
AT3G29250	2.40569	0.0001155
AT3G60470	2.41302	2.60679e-05
AT1G56240	2.42123	0.000102384
AT2G38290	2.42861	1.925e-36
AT5G15120	2.42977	0.00287761
AT3G60966	2.43004	6.02717e-06
AT2G38110	2.44756	2.09753e-16
AT1G25400	2.4587	9.42594e-13
AT1G51860	2.46326	1.86772e-09
AT2G37970	2.46939	2.48122e-15
AT5G44990	2.47132	0.000374356
AT1G72060	2.47317	3.85208e-12
AT2G38250	2.482	9.8026e-10
AT4G05070	2.51892	9.44314e-22
AT3G10930	2.53564	0.000415241
AT1G71390	2.54355	2.58622e-05
AT3G16410	2.55399	0.00807435
AT3G57950	2.56208	0.00341362
AT2G36780	2.56333	5.54673e-09
AT1G75040	2.57971	3.04127e-26
AT5G56550	2.58847	8.79325e-10
AT2G38340	2.6	0.00375549
AT3G02840	2.61073	0.000105269
AT5G40010	2.6159	0.000903773
AT1G65510	2.62125	4.26185e-07
AT2G35980	2.66966	0.000156082
AT5G44460	2.67498	0.00216751
AT4G23310	2.70928	1.14203e-10
AT2G18660	2.7286	6.64295e-17
AT4G04900	2.73206	1.43666e-05
AT3G49340	2.75605	2.15947e-13
AT4G04500	2.77344	3.13322e-15
AT5G52720	2.87179	5.65544e-05
AT3G46090	2.87682	3.34299e-15
AT3G44300	2.88553	1.45556e-07
AT1G21525	2.88687	7.50688e-16
AT4G04510	2.91238	3.95215e-10
AT3G13960	2.92945	0.0057137
AT5G19880	2.93437	0.000141675
AT2G26400	2.93709	1.86137e-06
AT2G31945	3.00402	0.00351041
AT1G66960	3.01841	2.47974e-08
AT1G03850	3.06377	1.76268e-22
AT5G12880	3.09848	0.00414741
AT1G21310	3.15051	3.99684e-20
AT1G22990	3.17273	5.31752e-08
AT3G27473	3.1928	0.00451348
AT2G37750	3.19284	4.88255e-08
AT3G46080	3.19606	1.95379e-09
AT3G29639	3.2064	4.17932e-11
AT2G43570	3.23436	6.65632e-51
AT4G39610	3.23933	0.000374683
AT4G04972	3.31201	9.5062e-06
AT4G13890	3.32625	9.40311e-07
AT1G67980	3.47258	4.64808e-17
AT2G23830	3.53753	0.0080954
AT4G05030	3.66809	7.99282e-06
AT2G14610	3.76829	1.19885e-18
AT1G44130	3.78792	8.3563e-07
AT1G26410	3.81702	0.000993388
AT3G16450	3.86603	2.60394e-05
AT1G33840	3.9646	4.12944e-06
AT1G33055	3.99263	8.18889e-05
AT3G45330	4.07656	0.00676473
AT5G66690	4.20455	1.6341e-06
AT2G20870	4.33069	0.00433577
AT4G10860	4.65284	2.94155e-05
AT5G22560	4.80444	0.00342715
AT4G20000	4.94808	1.63982e-29
AT2G03821	5.29097	0.000226937
AT3G47210	5.56421	0.00015567
AT4G05470	5.81736	1.61048e-05
AT5G22430	5.92124	0.000106117
AT4G05475	8.01881	7.0921e-12

## Sheet: GENES-DOWN
List of down-regulated genes in L6F6 with a log2FoldChange 1,5>
GENE	log2FoldChange	pvalue	padj
AT1G53480	-6.68136	7.68486e-50	8.1133e-46
AT4G38410	-3.66782	0.00037786	0.00808056
AT5G44440	-2.97701	6.63828e-06	0.000270072
AT1G69140	-2.71315	3.60171e-11	5.35564e-09
AT2G30830	-2.68491	0.000438332	0.00904729
AT5G38120	-2.55232	8.64336e-06	0.000337971
AT5G52310	-2.48658	1.10617e-09	1.26253e-07
AT1G70640	-2.43835	6.87914e-06	0.000278263
AT5G53710	-2.38544	0.00012875	0.0033556
AT4G34580	-2.33512	0.000376204	0.00807272
AT5G52300	-2.3336	4.64034e-08	3.49931e-06
AT1G62570	-2.24091	1.10213e-05	0.000417052
AT3G58070	-2.19731	6.23348e-10	7.47592e-08
AT5G41900	-2.1403	1.83749e-07	1.16512e-05
AT1G53490	-2.05509	2.04713e-06	9.73539e-05
AT3G27250	-2.03236	5.81235e-05	0.00171647
AT4G16740	-2.02741	0.000385885	0.0081889
AT2G42540	-1.98856	1.82118e-06	8.84005e-05
AT5G15960	-1.9789	1.82708e-08	1.56189e-06
AT5G60290	-1.95562	8.88532e-05	0.00247511
AT3G45940	-1.91169	0.000226068	0.00532575
AT3G55940	-1.89777	4.03811e-07	2.33602e-05
AT1G61120	-1.84217	6.35631e-05	0.00186149
AT3G30122	-1.80981	5.72203e-05	0.00169692
AT5G46600	-1.78011	5.94895e-08	4.33145e-06
AT2G20880	-1.74916	0.000372442	0.00800826
AT1G27030	-1.69697	3.37768e-12	6.09569e-10
AT1G04570	-1.69353	4.68283e-05	0.00142887
AT1G04220	-1.68868	3.57119e-05	0.00113555
AT1G10370	-1.63313	2.83039e-06	0.00012635
AT2G47780	-1.61304	4.02065e-06	0.000171161
AT1G28010	-1.60999	0.000269225	0.00613897
AT4G21440	-1.58251	0.000425689	0.00886432
AT2G33380	-1.55648	0.000107243	0.002892
AT3G05640	-1.55459	8.85427e-05	0.00247299
AT5G11590	-1.52272	1.30864e-06	6.59473e-05
AT2G42530	-1.51417	9.91344e-05	0.00272555

## Sheet: TE_UP
List of up-regulated TE in L6F6 with a log2FoldChange 1,5<
TE	log2FoldChange	padj
AT3TE76010	1.79494	4.59109e-05
AT5TE30315	2.02277	1.8973e-06
AT4TE10285	2.09305	1.30192e-09
AT4TE10620	2.17856	8.06516e-05
AT2TE71535	2.27447	5.31752e-08
AT1TE89775	2.31929	0.00170742
AT4TE09845	2.39315	2.44979e-11
AT5TE30270	2.93652	0.00189578
AT4TE12660	3.24451	0.00492297
AT2TE25440	3.63138	7.13338e-11
AT2TE71050	4.28942	0.00410214
AT5TE44255	5.29772	0.000711242
AT5TE44265	5.91639	2.14008e-05
AT1TE93275	8.1962	6.38358e-13

## Sheet: TE-DOWN
List of down-regulated genes in L6F6 with a log2FoldChange 1,5<
TE	log2FoldChange	padj
AT4TE21055	-3.86084	0.00570719
AT1TE85165	-3.29017	0.000750046
AT5TE46155	-1.5979	0.00628793

## Sheet: Gain-NAD-GENES in L6F6
List of genes gaining nucleolar association in L6F6 compare to wild-type Col-0
GENE
AT1G02080
AT1G04760
AT1G05550
AT1G05810
AT1G06590
AT1G06740
AT1G07030
AT1G07040
AT1G08630
AT1G08640
AT1G09160
AT1G11080
AT1G11720
AT1G11730
AT1G11960
AT1G12020
AT1G13800
AT1G13980
AT1G17540
AT1G17745
AT1G20970
AT1G21973
AT1G23090
AT1G24000
AT1G24120
AT1G24265
AT1G26520
AT1G26530
AT1G27030
AT1G27430
AT1G27680
AT1G29940
AT1G29950
AT1G29951
AT1G29952
AT1G30120
AT1G30690
AT1G30935
AT1G31150
AT1G32960
AT1G32970
AT1G33240
AT1G33360
AT1G33860
AT1G34120
AT1G34315
AT1G35617
AT1G35790
AT1G36400
AT1G36650
AT1G37012
AT1G37015
AT1G37057
AT1G37999
AT1G38340
AT1G39670
AT1G40085
AT1G41930
AT1G42380
AT1G42580
AT1G42703
AT1G43300
AT1G43830
AT1G44318
AT1G44350
AT1G47395
AT1G48510
AT1G49190
AT1G49370
AT1G49380
AT1G49550
AT1G53070
AT1G53140
AT1G53230
AT1G53233
AT1G54445
AT1G56530
AT1G57650
AT1G58210
AT1G58220
AT1G61960
AT1G62920
AT1G63855
AT1G65850
AT1G66130
AT1G66450
AT1G66710
AT1G67490
AT1G68150
AT1G68160
AT1G70530
AT1G71390
AT1G73410
AT1G74160
AT1G75400
AT1G75410
AT1G76670
AT2G01008
AT2G01010
AT2G01020
AT2G01021
AT2G01022
AT2G01023
AT2G01024
AT2G01026
AT2G01028
AT2G01029
AT2G01031
AT2G01034
AT2G01037
AT2G01040
AT2G01060
AT2G01080
AT2G01090
AT2G01100
AT2G01110
AT2G01130
AT2G01190
AT2G01200
AT2G01220
AT2G01260
AT2G01580
AT2G01590
AT2G01670
AT2G01710
AT2G01720
AT2G01750
AT2G01980
AT2G02080
AT2G02230
AT2G02480
AT2G02835
AT2G02840
AT2G02955
AT2G03010
AT2G03931
AT2G03938
AT2G03955
AT2G04042
AT2G04110
AT2G05200
AT2G05340
AT2G05350
AT2G05400
AT2G05410
AT2G05430
AT2G05518
AT2G05635
AT2G06100
AT2G06110
AT2G06140
AT2G06170
AT2G06245
AT2G06270
AT2G06310
AT2G06335
AT2G06410
AT2G06906
AT2G07510
AT2G07530
AT2G07580
AT2G07590
AT2G07690
AT2G07790
AT2G09953
AT2G10210
AT2G10600
AT2G11820
AT2G11950
AT2G12770
AT2G12835
AT2G12920
AT2G13274
AT2G13360
AT2G13490
AT2G13500
AT2G13510
AT2G13520
AT2G13650
AT2G13770
AT2G13970
AT2G14130
AT2G14560
AT2G14605
AT2G14635
AT2G14930
AT2G15230
AT2G15240
AT2G15410
AT2G15920
AT2G16130
AT2G16367
AT2G16500
AT2G16730
AT2G17064
AT2G17070
AT2G17320
AT2G17340
AT2G19230
AT2G19390
AT2G20890
AT2G22260
AT2G22425
AT2G24130
AT2G24340
AT2G24513
AT2G24750
AT2G24755
AT2G24820
AT2G25010
AT2G25011
AT2G25015
AT2G25025
AT2G25040
AT2G25130
AT2G25390
AT2G25400
AT2G26280
AT2G26290
AT2G26730
AT2G27280
AT2G27700
AT2G27980
AT2G28220
AT2G28230
AT2G29700
AT2G29710
AT2G31530
AT2G33910
AT2G33980
AT2G34680
AT2G34960
AT2G36170
AT2G36180
AT2G36490
AT2G36530
AT2G42140
AT2G44290
AT2G44660
AT2G46270
AT2G46280
AT2G46290
AT2G46700
AT3G01060
AT3G03540
AT3G03730
AT3G03740
AT3G03780
AT3G06910
AT3G08690
AT3G08700
AT3G11560
AT3G20940
AT3G21160
AT3G24260
AT3G24390
AT3G24450
AT3G25805
AT3G26190
AT3G26614
AT3G26616
AT3G26890
AT3G28005
AT3G28720
AT3G28730
AT3G29280
AT3G29290
AT3G29350
AT3G29764
AT3G29778
AT3G29786
AT3G29788
AT3G29796
AT3G30280
AT3G30330
AT3G30550
AT3G30716
AT3G31406
AT3G31410
AT3G31420
AT3G31902
AT3G31903
AT3G32091
AT3G32130
AT3G32313
AT3G32316
AT3G32371
AT3G33065
AT3G33069
AT3G33083
AT3G33169
AT3G41761
AT3G41762
AT3G41768
AT3G41979
AT3G42432
AT3G43160
AT3G43546
AT3G43575
AT3G43625
AT3G43652
AT3G43654
AT3G43825
AT3G43835
AT3G43867
AT3G43880
AT3G44096
AT3G44570
AT3G44580
AT3G44757
AT3G45400
AT3G46060
AT3G46070
AT3G46180
AT3G46350
AT3G47260
AT3G47350
AT3G47680
AT3G49960
AT3G51660
AT3G51700
AT3G53160
AT3G53170
AT3G54085
AT3G54090
AT3G56100
AT3G56150
AT3G56160
AT3G57150
AT3G57720
AT3G62680
AT3G63240
AT4G01265
AT4G02760
AT4G03750
AT4G04775
AT4G05588
AT4G15096
AT4G15110
AT4G15130
AT4G15230
AT4G16560
AT4G16563
AT4G20990
AT4G25600
AT4G27080
AT4G28260
AT4G37690
AT4G37700
AT4G38810
AT4G39350
AT5G01270
AT5G01810
AT5G03240
AT5G11720
AT5G15450
AT5G16180
AT5G17330
AT5G17930
AT5G19140
AT5G19150
AT5G20040
AT5G22320
AT5G23120
AT5G23720
AT5G25250
AT5G25380
AT5G25460
AT5G25615
AT5G27640
AT5G28030
AT5G28596
AT5G28615
AT5G28620
AT5G28655
AT5G28720
AT5G28826
AT5G29015
AT5G29295
AT5G29762
AT5G30060
AT5G30269
AT5G30584
AT5G31032
AT5G31511
AT5G32122
AT5G33438
AT5G34839
AT5G35880
AT5G36661
AT5G36935
AT5G37160
AT5G37550
AT5G38470
AT5G38590
AT5G39440
AT5G39710
AT5G40450
AT5G41980
AT5G41990
AT5G41992
AT5G42000
AT5G42400
AT5G42620
AT5G42630
AT5G42635
AT5G43280
AT5G43745
AT5G44635
AT5G44800
AT5G45150
AT5G45180
AT5G45250
AT5G45960
AT5G46510
AT5G47210
AT5G49150
AT5G49152
AT5G49900
AT5G49980
AT5G50210
AT5G51200
AT5G51950
AT5G53110
AT5G54160
AT5G54206
AT5G55630
AT5G56260
AT5G57990
AT5G61140
AT5G61150
AT5G61560
AT5G67230
AT5G67240

## Sheet: Lost-NAD-GENES in L6F6
List of genes losing nucleolar association in L6F6 compare to wild-type Col-0
GENE
AT1G01580
AT1G02145
AT1G02150
AT1G03080
AT1G03400
AT1G04470
AT1G05270
AT1G05300
AT1G05940
AT1G06340
AT1G06360
AT1G06410
AT1G07830
AT1G09176
AT1G09180
AT1G09730
AT1G09740
AT1G09794
AT1G09995
AT1G10470
AT1G10490
AT1G10760
AT1G10770
AT1G11420
AT1G11710
AT1G12110
AT1G12300
AT1G12980
AT1G13720
AT1G13730
AT1G14550
AT1G14560
AT1G14600
AT1G14610
AT1G14620
AT1G14800
AT1G14950
AT1G17940
AT1G19120
AT1G19130
AT1G20070
AT1G20100
AT1G20110
AT1G21140
AT1G21150
AT1G21580
AT1G21790
AT1G22740
AT1G24733
AT1G25270
AT1G25275
AT1G25560
AT1G26110
AT1G26190
AT1G27385
AT1G27580
AT1G27590
AT1G29980
AT1G30010
AT1G30780
AT1G31290
AT1G34510
AT1G35465
AT1G36078
AT1G36080
AT1G40136
AT1G40137
AT1G42430
AT1G42460
AT1G44191
AT1G45040
AT1G45050
AT1G46624
AT1G47910
AT1G48230
AT1G48240
AT1G48820
AT1G49240
AT1G50300
AT1G54740
AT1G55120
AT1G55300
AT1G55750
AT1G55770
AT1G55790
AT1G55820
AT1G55830
AT1G55860
AT1G55870
AT1G56250
AT1G56440
AT1G56450
AT1G56675
AT1G58320
AT1G59650
AT1G62590
AT1G62600
AT1G64380
AT1G64500
AT1G65430
AT1G65910
AT1G66830
AT1G67580
AT1G68330
AT1G68670
AT1G68690
AT1G69420
AT1G69570
AT1G69850
AT1G72460
AT1G74850
AT1G75240
AT1G75490
AT1G75900
AT1G78090
AT1G79780
AT1G79790
AT2G10190
AT2G11940
AT2G12650
AT2G17525
AT2G19450
AT2G22360
AT2G23348
AT2G23350
AT2G23770
AT2G23890
AT2G26080
AT2G26130
AT2G26380
AT2G26510
AT2G27440
AT2G29060
AT2G29270
AT2G29280
AT2G29290
AT2G30460
AT2G30470
AT2G31090
AT2G31100
AT2G32530
AT2G34690
AT2G35360
AT2G35370
AT2G35380
AT2G35530
AT2G35540
AT2G36130
AT2G36140
AT2G36145
AT2G36420
AT2G36480
AT2G37110
AT2G38530
AT2G40350
AT2G40360
AT2G40940
AT2G41240
AT2G41750
AT2G41760
AT2G44350
AT2G44690
AT2G44735
AT2G47520
AT3G01080
AT3G02300
AT3G02310
AT3G02650
AT3G02660
AT3G02850
AT3G02910
AT3G02920
AT3G03560
AT3G04180
AT3G05165
AT3G05741
AT3G06080
AT3G07510
AT3G07520
AT3G08530
AT3G08930
AT3G08940
AT3G09090
AT3G09180
AT3G09670
AT3G09680
AT3G09720
AT3G09730
AT3G10280
AT3G10400
AT3G10690
AT3G11130
AT3G11150
AT3G11450
AT3G11460
AT3G11840
AT3G12620
AT3G12950
AT3G12980
AT3G13062
AT3G13080
AT3G13594
AT3G13910
AT3G13920
AT3G15360
AT3G15720
AT3G15780
AT3G15790
AT3G16480
AT3G18210
AT3G18710
AT3G19010
AT3G19190
AT3G19630
AT3G19680
AT3G19690
AT3G19910
AT3G20170
AT3G20770
AT3G20870
AT3G21240
AT3G21465
AT3G21470
AT3G22070
AT3G22072
AT3G22320
AT3G22330
AT3G26930
AT3G27820
AT3G27825
AT3G27830
AT3G27831
AT3G28223
AT3G28230
AT3G28340
AT3G29205
AT3G29420
AT3G32195
AT3G42150
AT3G42535
AT3G42545
AT3G45577
AT3G45580
AT3G47295
AT3G49430
AT3G49440
AT3G49580
AT3G49700
AT3G50665
AT3G50670
AT3G50690
AT3G52170
AT3G52510
AT3G52950
AT3G54840
AT3G59280
AT3G60080
AT3G60720
AT3G62610
AT4G00240
AT4G00310
AT4G00950
AT4G01830
AT4G01860
AT4G01865
AT4G01870
AT4G01890
AT4G01950
AT4G01985
AT4G02010
AT4G02030
AT4G02040
AT4G02350
AT4G02600
AT4G02780
AT4G03040
AT4G03190
AT4G04640
AT4G04890
AT4G04925
AT4G06491
AT4G06522
AT4G06646
AT4G06698
AT4G06699
AT4G08950
AT4G10180
AT4G10465
AT4G11390
AT4G11780
AT4G11870
AT4G12320
AT4G12470
AT4G13710
AT4G13750
AT4G14135
AT4G14250
AT4G14270
AT4G14272
AT4G14305
AT4G14310
AT4G14465
AT4G14580
AT4G14780
AT4G14800
AT4G15790
AT4G16150
AT4G16155
AT4G16235
AT4G16470
AT4G16475
AT4G16490
AT4G16630
AT4G16700
AT4G16710
AT4G16750
AT4G17040
AT4G17050
AT4G17300
AT4G17410
AT4G17905
AT4G17910
AT4G18610
AT4G18700
AT4G20320
AT4G20325
AT4G20490
AT4G21215
AT4G21390
AT4G21560
AT4G21570
AT4G21750
AT4G22415
AT4G22670
AT4G23520
AT4G23895
AT4G23900
AT4G23910
AT4G24000
AT4G24010
AT4G26080
AT4G26400
AT4G26410
AT4G26570
AT4G27660
AT4G27800
AT4G28780
AT4G28940
AT4G29090
AT4G29650
AT4G29880
AT4G30520
AT4G31500
AT4G31830
AT4G31940
AT4G33865
AT4G33880
AT4G34750
AT4G36260
AT4G36710
AT4G36720
AT4G36750
AT4G36900
AT4G36910
AT4G37460
AT4G39361
AT4G39363
AT4G39364
AT4G39366
AT4G39860
AT4G39865
AT4G39870
AT4G39880
AT4G39890
AT5G02330
AT5G03520
AT5G03530
AT5G03730
AT5G03795
AT5G04700
AT5G04853
AT5G04860
AT5G04990
AT5G05970
AT5G06350
AT5G06620
AT5G06770
AT5G07320
AT5G07322
AT5G08260
AT5G09650
AT5G09970
AT5G10300
AT5G11890
AT5G11940
AT5G13150
AT5G13370
AT5G13380
AT5G13410
AT5G14270
AT5G14290
AT5G14300
AT5G14380
AT5G14390
AT5G14860
AT5G14910
AT5G15360
AT5G15560
AT5G15660
AT5G17370
AT5G17380
AT5G17730
AT5G17770
AT5G18460
AT5G19210
AT5G23150
AT5G25420
AT5G25610
AT5G25880
AT5G26283
AT5G26618
AT5G26642
AT5G26790
AT5G27900
AT5G28415
AT5G28635
AT5G28680
AT5G28870
AT5G28940
AT5G34833
AT5G34940
AT5G35630
AT5G35631
AT5G38860
AT5G40200
AT5G40630
AT5G40820
AT5G41570
AT5G41580
AT5G42290
AT5G42300
AT5G42740
AT5G43105
AT5G43516
AT5G44090
AT5G44925
AT5G45190
AT5G45210
AT5G45220
AT5G46595
AT5G46600
AT5G48600
AT5G48980
AT5G48990
AT5G49410
AT5G49420
AT5G49660
AT5G49780
AT5G49990
AT5G50770
AT5G51195
AT5G51900
AT5G52750
AT5G53170
AT5G53390
AT5G53450
AT5G53510
AT5G53610
AT5G55135
AT5G55140
AT5G56320
AT5G56790
AT5G57870
AT5G58010
AT5G58020
AT5G58120
AT5G61050
AT5G61060
AT5G61690
AT5G61997
AT5G62200
AT5G62210
AT5G62280
AT5G62310
AT5G62620
AT5G62720
AT5G62780
AT5G62790
AT5G63190
AT5G63195
AT5G64190
AT5G64910
AT5G65230
AT5G66240
AT5G66250
AT5G66455
AT5G66460
AT5G66850

## Sheet: Lost-NAD-TEs in L6F6
List of TE losing nucleolar association in L6F6 compare to wild-type Col-0
TE
AT1TE10610
AT1TE16505
AT1TE23410
AT1TE24170
AT1TE28250
AT1TE29200
AT1TE35425
AT1TE35430
AT1TE36160
AT1TE41145
AT1TE41350
AT1TE42345
AT1TE42585
AT1TE42590
AT1TE42595
AT1TE44125
AT1TE50375
AT1TE50775
AT1TE52420
AT1TE52425
AT1TE54885
AT1TE54890
AT1TE54895
AT1TE54900
AT1TE55835
AT1TE56095
AT1TE56100
AT1TE56405
AT1TE56410
AT1TE57220
AT1TE58625
AT1TE59875
AT1TE61450
AT1TE63990
AT1TE67480
AT1TE70190
AT1TE75050
AT1TE81880
AT1TE93915
AT2TE16580
AT2TE16585
AT2TE16590
AT2TE16595
AT2TE19970
AT2TE19975
AT2TE19980
AT2TE25300
AT2TE25305
AT2TE25310
AT2TE56840
AT2TE56845
AT2TE68100
AT2TE68105
AT2TE73130
AT2TE73135
AT3TE02640
AT3TE07160
AT3TE11850
AT3TE27070
AT3TE29575
AT3TE30510
AT3TE38115
AT3TE38120
AT3TE41100
AT3TE42850
AT3TE42855
AT3TE44020
AT3TE44025
AT3TE44030
AT3TE44310
AT3TE44315
AT3TE45355
AT3TE46470
AT3TE46475
AT3TE53850
AT3TE53855
AT3TE53875
AT3TE57645
AT3TE58650
AT3TE58655
AT3TE59885
AT3TE59890
AT3TE59895
AT3TE59985
AT3TE70630
AT3TE71950
AT3TE75720
AT3TE76310
AT3TE80000
AT4TE00690
AT4TE02130
AT4TE06835
AT4TE06840
AT4TE06845
AT4TE09140
AT4TE09145
AT4TE10945
AT4TE10950
AT4TE10955
AT4TE10960
AT4TE14370
AT4TE14385
AT4TE15080
AT4TE15085
AT4TE15090
AT4TE15095
AT4TE16765
AT4TE17005
AT4TE17010
AT4TE17015
AT4TE17200
AT4TE17205
AT4TE18815
AT4TE19960
AT4TE19965
AT4TE21965
AT4TE21970
AT4TE24340
AT4TE26510
AT4TE26515
AT4TE27645
AT4TE27650
AT4TE28625
AT4TE28630
AT4TE30725
AT4TE30735
AT4TE30740
AT4TE31015
AT4TE35980
AT4TE36320
AT4TE37090
AT4TE41305
AT4TE44415
AT4TE44420
AT4TE45190
AT4TE46705
AT4TE50640
AT4TE54700
AT4TE60830
AT4TE60835
AT4TE67780
AT4TE70655
AT4TE70660
AT4TE73720
AT4TE83950
AT4TE85060
AT5TE08400
AT5TE28210
AT5TE32005
AT5TE32010
AT5TE33315
AT5TE33540
AT5TE33545
AT5TE36115
AT5TE37815
AT5TE38745
AT5TE39550
AT5TE39950
AT5TE39955
AT5TE46210
AT5TE48350
AT5TE48355
AT5TE48360
AT5TE54280
AT5TE54285
AT5TE55640
AT5TE61040
AT5TE62545
AT5TE63190
AT5TE63195
AT5TE63200
AT5TE65370
AT5TE71460
AT5TE71465
AT5TE72140
AT5TE73270
AT5TE74930
AT5TE74935
AT5TE84440
AT5TE85550
AT5TE90620

## Sheet: Hypermethyladed-GENES in L6F6
List of hyper-methylated genes in L6F6 compare to wild-type Col-0
GENE
AT1G02080
AT1G02840
AT1G02890
AT1G04140
AT1G04700
AT1G05570
AT1G08290
AT1G08400
AT1G10320
AT1G15910
AT1G18470
AT1G18540
AT1G20225
AT1G20760
AT1G21580
AT1G23480
AT1G23900
AT1G25430
AT1G25682
AT1G26730
AT1G26740
AT1G30060
AT1G30410
AT1G30790
AT1G31660
AT1G33415
AT1G33430
AT1G34360
AT1G36180
AT1G36360
AT1G36650
AT1G36960
AT1G39430
AT1G40078
AT1G42440
AT1G42620
AT1G44020
AT1G48090
AT1G50350
AT1G50620
AT1G51640
AT1G51645
AT1G53300
AT1G53480
AT1G53490
AT1G53520
AT1G54260
AT1G54550
AT1G54985
AT1G56290
AT1G56350
AT1G57720
AT1G58025
AT1G58410
AT1G59760
AT1G60095
AT1G61460
AT1G61830
AT1G61970
AT1G62170
AT1G63080
AT1G63980
AT1G63990
AT1G67140
AT1G67460
AT1G67840
AT1G68285
AT1G69290
AT1G70300
AT1G70310
AT1G70320
AT1G71010
AT1G71980
AT1G72660
AT1G72670
AT1G73020
AT1G73200
AT1G73240
AT1G74250
AT1G74260
AT1G76620
AT1G77800
AT1G78580
AT1G79150
AT1G79380
AT1G79610
AT1G80680
AT2G01026
AT2G04660
AT2G05320
AT2G05730
AT2G06210
AT2G06490
AT2G07130
AT2G07310
AT2G07580
AT2G07788
AT2G11000
AT2G11320
AT2G12360
AT2G12670
AT2G13440
AT2G13680
AT2G14510
AT2G15030
AT2G15450
AT2G16720
AT2G16920
AT2G18510
AT2G19090
AT2G19160
AT2G19170
AT2G20463
AT2G20810
AT2G21240
AT2G22140
AT2G22610
AT2G23400
AT2G24910
AT2G25050
AT2G25140
AT2G26330
AT2G26460
AT2G27700
AT2G29960
AT2G30090
AT2G33006
AT2G33740
AT2G37680
AT2G37810
AT2G37860
AT2G38170
AT2G38195
AT2G38210
AT2G38220
AT2G39200
AT2G43420
AT2G44060
AT2G44350
AT2G45480
AT2G45720
AT2G46450
AT2G47350
AT3G01410
AT3G04980
AT3G05280
AT3G05540
AT3G05840
AT3G06580
AT3G07650
AT3G08850
AT3G09850
AT3G10270
AT3G10986
AT3G12180
AT3G12810
AT3G14120
AT3G14470
AT3G14830
AT3G16230
AT3G16785
AT3G16895
AT3G17155
AT3G17310
AT3G18165
AT3G20540
AT3G20650
AT3G20720
AT3G20730
AT3G20780
AT3G21280
AT3G21590
AT3G21980
AT3G21985
AT3G22420
AT3G23280
AT3G23660
AT3G24200
AT3G24630
AT3G26550
AT3G26850
AT3G28410
AT3G29778
AT3G29781
AT3G31440
AT3G32360
AT3G32415
AT3G32968
AT3G33109
AT3G42466
AT3G44090
AT3G45830
AT3G48190
AT3G49870
AT3G50050
AT3G50808
AT3G51730
AT3G53540
AT3G54360
AT3G54380
AT3G55260
AT3G57090
AT3G58220
AT3G58940
AT3G59360
AT3G61130
AT3G61180
AT3G62700
AT3G63250
AT4G00020
AT4G00900
AT4G00910
AT4G01490
AT4G01570
AT4G02070
AT4G02480
AT4G02650
AT4G03530
AT4G03820
AT4G04790
AT4G04940
AT4G04957
AT4G05087
AT4G05490
AT4G07566
AT4G07630
AT4G08790
AT4G09584
AT4G10520
AT4G12060
AT4G12700
AT4G13330
AT4G13440
AT4G13460
AT4G14150
AT4G14210
AT4G15900
AT4G16180
AT4G16280
AT4G16420
AT4G16960
AT4G17770
AT4G18060
AT4G18240
AT4G18780
AT4G21630
AT4G24652
AT4G25719
AT4G25720
AT4G25890
AT4G27830
AT4G28820
AT4G29420
AT4G29860
AT4G30020
AT4G30740
AT4G30990
AT4G32300
AT4G32370
AT4G32375
AT4G32420
AT4G32551
AT4G32630
AT4G33120
AT4G33320
AT4G34090
AT4G36760
AT4G37500
AT4G37940
AT4G38120
AT4G39420
AT4G39850
AT5G01460
AT5G01770
AT5G01800
AT5G02700
AT5G04235
AT5G04420
AT5G05400
AT5G06770
AT5G06810
AT5G07180
AT5G08480
AT5G08520
AT5G09280
AT5G09350
AT5G09570
AT5G09710
AT5G09890
AT5G09950
AT5G10160
AT5G10720
AT5G12980
AT5G13340
AT5G13460
AT5G13480
AT5G14540
AT5G15070
AT5G15570
AT5G16810
AT5G18410
AT5G20920
AT5G21930
AT5G22370
AT5G25100
AT5G26670
AT5G26742
AT5G28287
AT5G30207
AT5G30420
AT5G31891
AT5G33442
AT5G35146
AT5G35370
AT5G35450
AT5G35690
AT5G37310
AT5G37620
AT5G38383
AT5G38830
AT5G39645
AT5G40290
AT5G40640
AT5G41770
AT5G41990
AT5G41992
AT5G45250
AT5G45260
AT5G45290
AT5G46930
AT5G47690
AT5G48730
AT5G49840
AT5G51250
AT5G55130
AT5G55270
AT5G56650
AT5G58870
AT5G60450
AT5G63420
AT5G65770
AT5G65780
AT5G66180
AT5G67240

[truncated: 4 more sheets: Hypomethylated-GENES in L6F6, Hypomethylated-TE in L6F6, SNP-GENES, SNP_L6F8]
