# Supplementary material for: Large tandem duplications affect gene expression, 3D organization, and plant–pathogen response
Source: HighWire-hosted journal article supplement (doi:10.1101/gr.261586.120), 2020-10-08
Supplement: Supplemental_Table_S2_JDedit.xlsx [file Supplemental_Table_S2_JDedit.xlsx]

## Sheet: Feuil1
Table describing the characteristics of the 16 large structural variant found in this study. Legend can be found at the bottom of the table
BORDER	Border description	position on chr	GENE name	Distribution in lines	TDDO or DEL size (bp)
TDDO1 LB	AT1G54770	Chr1:20,435,033	FCF2 pre-rRNA processing protein	L6, L9	202755
TDDO1 RB	AT1G55325	Chr1:20,637,788	Mediator 13 _ GCT	L6, L9	202755
TDDO2 LB	IGS	Chr2:6,345,231		L6	77901
TDDO2 RB	AT2G14930	Chr2:6,423,132	TE	L6	77901
TDDO3 LB	AT2G37520	Chr2:15,749,274	Acyl-CoA N-acyltransferase with RING/FYVE/PHD-type zinc	L6	355525
TDDO3 RB	AT2G38460	Chr2:16,104,799	IREG1	L6	355525
TDDO4 LB	AT4G02960	Chr4:1,313,756	AT4TE06710 (Copia)	L6, fas2	1453051
TDDO4 RB	AT4G05475	Chr4:2,766,807	RNI1-like	L6, fas2	1453051
TDDO5 LB	AT4G04950	Chr4:2,517,674	GRXS_17	L6, L9	96753
TDDO5 RB	IGS	Chr4:2,614,427		L6, L9	96753
TDDO6 LB	AT4G19860	Chr4:10,779,531	cytosolic calcium-independent phospholipase A.	L6	59638
TDDO6 RB	IGS	Chr4:10,839,169		L6	59638
TDDO7 LB	IGS	Chr5:12,489,606		L6, L9	99730
TDDO7 RB	AT5G33320	Chr5:12,589,336	CUE1	L6, L9	99730
TDDO8 LB	AT5G24260	Chr5:8,237,988	prolyl oligopeptidase family protein	fas2	286593
TDDO8 RB	AT5G24820	Chr5:8,524,581	Eukaryotic aspartyl protease family protein	fas2	286593
TDDO9 LB	AT4G25220	Chr4:12,921,881	glycerol-3-phosphate permease 2, G3Pp2	fas2	106828
TDDO9 RB	AT4G25515	Chr4:13,028,709	SEUSS-like 3, SLK3	fas2	106828
TDDO10 LB	IGS	Chr1:3,595,445		fas1	70624
TDDO10 RB	AT1G10970	Chr1:3,666,069	zinc transporter 4 (ZIP4)	fas1	70624
TDDO11 LB	AT2G03990	Chr2:1,266,696	TE	fas1	77270
TDDO11 RB	AT2G04060	Chr2:1,343,966	glycosyl hydrolase family 35 protein	fas1	77270
TDDO12 LB	AT4G18030	Chr4:10,014,227	S-adenosyl-L-methionine-dependent methyltransferases	fas1	57849
TDDO12 RB	AT4G18197	Chr4:10,072,076	purine permease 7 (PUP7)	fas1	57849
TDDO13 LB	AT5G33050	Chr5:12,406,977	TE (gypsy element)	fas1	175321
TDDO13 RB	IGS	Chr5:12,582,298		fas1	175321
TDDO14 LB	IGS	Chr5:14,178,149		fas1	64318
TDDO14 RB	AT5G36075	Chr5:14,242,467	TE (MuDR family)	fas1	64318
TDDO15LB	IGS	Chr5:26,169,422		fas1	151977
TDDO15 RB	IGS	Chr5:26,321,399		fas1	151977
DEL1 LB	IGS	Chr4:11,316,008		fas2	9750
DEL1 RB	AT4G21250	Chr4:11,325,758	Sulfite exporter TauE/SafE family protein;	fas2	9750
Legend:
TDDO = Tandem Duplication in Direct Orientation
DEL = Deletion
LB = left border
RB = right border
L6 = 20rDNA L6F6
L9 = 20rDNA L9F6
fas1 = fas1-4 (parental line G4 + 1 generation)
fas2 = fas2-4 (parental line G4 + 1 generation)
TE = Transposable Element
